# Supplementary material for: Real-time monitoring of mitochondrial oxygenation during machine perfusion using resonance Raman spectroscopy predicts organ function
Source: PubMed Central journal article supplement (PMC10973340; doi:10.1038/s41598-024-57773-w), 2024-03-27
Supplement: 41598_2024_57773_MOESM1_ESM.pdf [file 41598_2024_57773_MOESM1_ESM.pdf]

## SUPPLEMENTARY FIGURES

### Supplementary Figure 1: Perfusion parameters.

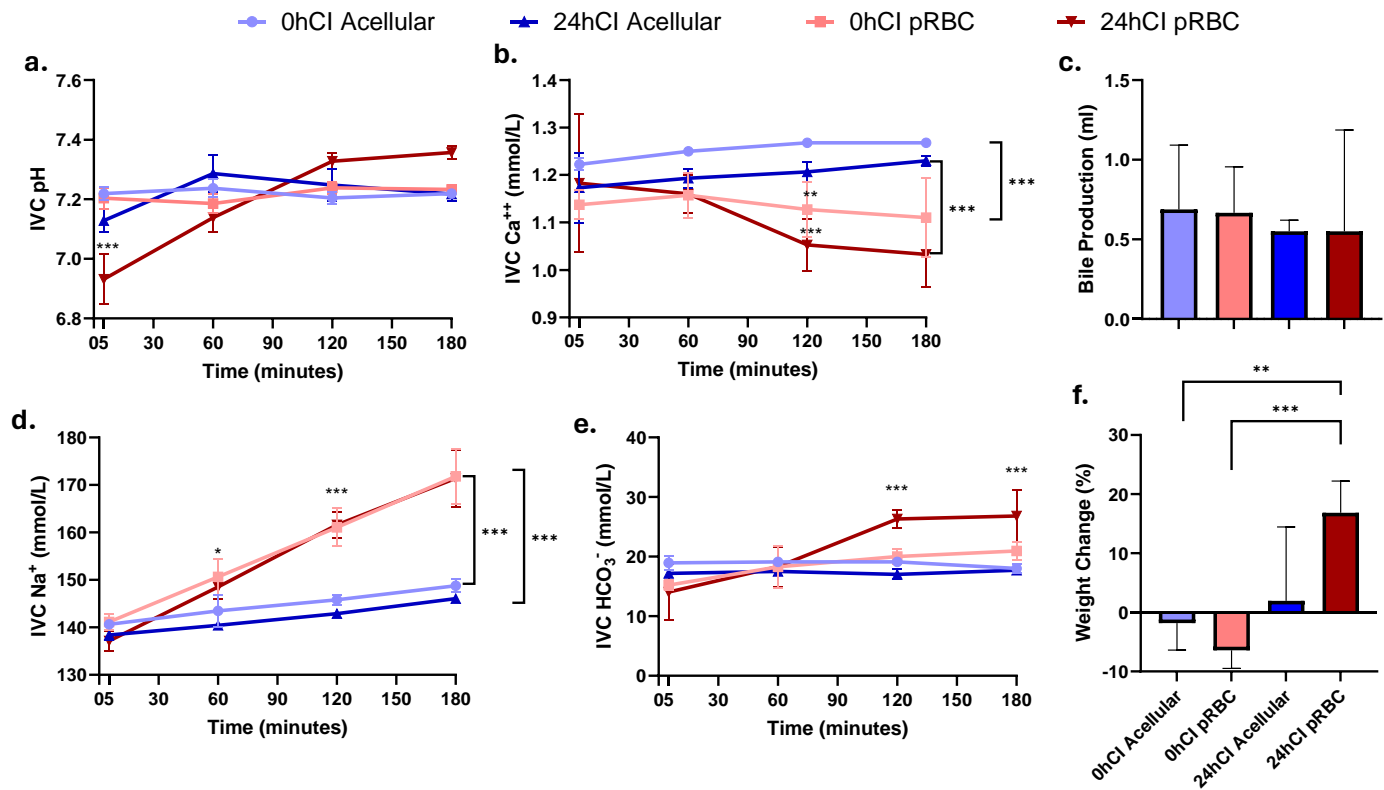

**Markers of perfusate biochemistry, bile production and weight change.** Perfusate biochemistry was monitored throughout the duration of perfusion as explained in methods section for IVC outflow pH, IVC Ca<sup>2+</sup>, IVC Na<sup>+</sup>, and IVC HCO<sub>3</sub><sup>-</sup>. We also quantified bile production and weight change of the whole liver. n=3-4 for each group. Statistically significant differences are shown as follows- \* p<0.05, \*\* p<0.01, \*\*\* p<0.005.

### Supplementary Figure 2: Lipid peroxidation using malondialdehyde (MDA) levels.

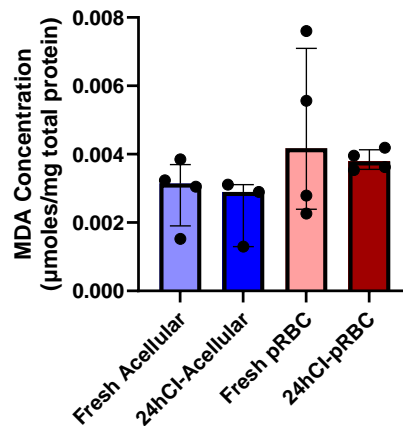

**Measurement of lipid peroxidation as a marker of oxidative stress.** A comparison of malondialdehyde (MDA) concentration, which is a measure of lipid peroxidation in biological material, was performed to assess damage due to oxidative stress. No statistically significant differences were observed between any of the groups (p>0.05, n=3-4).

**Supplementary Figure 3: Correlation of 3RMR with perfusion metrics.**

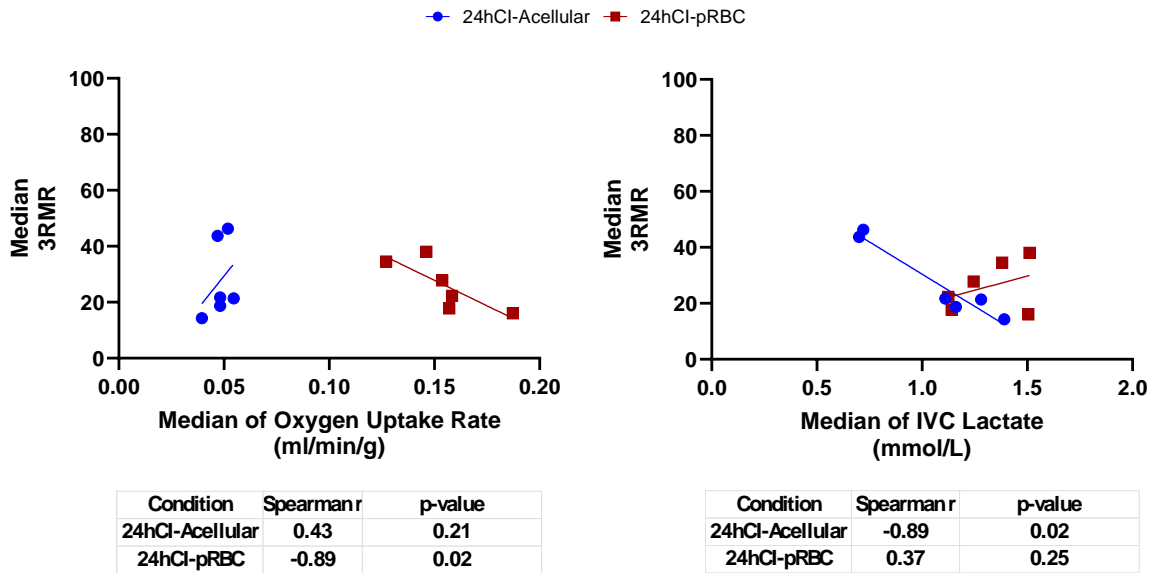

**Correlation assessment between 3RMR with Oxygen Uptake Rate and IVC lactate for cold stored livers.** We performed linear regression with spearman's rank correlation analysis to study the relationship between 3RMR with both oxygen uptake rate, and IVC lactate. Median values at each time starting t=30 minutes from 3-4 replicates for each group were used for this analysis in GraphPad. Graphs above show the results of this analysis with individual plots for each condition and a table that summarizes the results of the correlations observed.
